# Supplementary material for: Anthropometric Cut-Off Values for Detecting the Presence of Metabolic Syndrome and Its Multiple Components among Adults in Vietnam: The Role of Novel Indices
Source: MDPI journal article supplement (doi:10.3390/nu14194024), 2022-09-28
Supplement: s1 [file s1]

## Supplementary Materials

Table S1. Socio-economic characteristics of participants

|                       | Having MetS            |                | Without MetS           |                | Total                  |                | <i>p</i> -value    |
|-----------------------|------------------------|----------------|------------------------|----------------|------------------------|----------------|--------------------|
|                       | Frequency ( <i>n</i> ) | Percentage (%) | Frequency ( <i>n</i> ) | Percentage (%) | Frequency ( <i>n</i> ) | Percentage (%) |                    |
| <b>Gender</b>         |                        |                |                        |                |                        |                |                    |
| Males                 | 421                    | 39.9           | 1856                   | 50.9           | 2277                   | 48.4           | <0.01 <sup>†</sup> |
| Females               | 635                    | 60.1           | 1789                   | 49.1           | 2424                   | 51.6           |                    |
| <b>Age (Mean, SD)</b> | 55.2                   | 12.3           | 48.0                   | 14.2           | 49.6                   | 14.1           | <0.01*             |
| <b>Age group</b>      |                        |                |                        |                |                        |                |                    |
| 25-29                 | 34                     | 3.4            | 421                    | 12.1           | 455                    | 10.1           | <0.01 <sup>†</sup> |
| 30-39                 | 92                     | 9.3            | 763                    | 21.8           | 855                    | 19.1           |                    |
| 40-49                 | 210                    | 21.3           | 801                    | 22.9           | 1011                   | 22.6           |                    |
| 50-59                 | 282                    | 28.6           | 701                    | 20.1           | 984                    | 22.0           |                    |
| ≥ 60                  | 369                    | 37.4           | 807                    | 23.1           | 1176                   | 26.2           |                    |
| <b>Living areas</b>   |                        |                |                        |                |                        |                |                    |
| Urban                 | 151                    | 14.3           | 1058                   | 29.0           | 1209                   | 25.7           | <0.01 <sup>†</sup> |
| Rural                 | 207                    | 19.6           | 973                    | 26.7           | 1180                   | 25.1           |                    |
| Mountainous           | 272                    | 25.8           | 915                    | 25.1           | 1187                   | 25.3           |                    |
| Coastal               | 426                    | 40.3           | 699                    | 19.2           | 1125                   | 23.9           |                    |
| <b>Ethnic</b>         |                        |                |                        |                |                        |                |                    |
| Kinh                  | 893                    | 90.4           | 2985                   | 85.0           | 3878                   | 86.2           | <0.01 <sup>†</sup> |
| Others                | 95                     | 9.6            | 526                    | 15.0           | 621                    | 13.8           |                    |
| <b>Alcohol use</b>    |                        |                |                        |                |                        |                |                    |
| Never                 | 461                    | 46.7           | 1569                   | 44.7           | 2030                   | 45.1           | 0.20 <sup>†</sup>  |
| Special occasion      | 296                    | 30.0           | 1111                   | 31.6           | 1407                   | 31.3           |                    |
| Every week            | 104                    | 10.5           | 321                    | 9.1            | 425                    | 9.5            |                    |

|                            |     |      |      |      |      |      |                    |
|----------------------------|-----|------|------|------|------|------|--------------------|
| Every day                  | 126 | 12.8 | 511  | 14.6 | 637  | 14.2 |                    |
| <b>Smoking</b>             |     |      |      |      |      |      |                    |
| Never                      | 673 | 68.2 | 2252 | 64.1 | 2925 | 65.0 | <0.01 <sup>†</sup> |
| Sometimes/Rarely           | 47  | 4.8  | 244  | 7.0  | 291  | 6.5  |                    |
| Always                     | 266 | 27.0 | 1015 | 28.9 | 1281 | 28.5 |                    |
| <b>Salty eating habits</b> |     |      |      |      |      |      |                    |
| Normal                     | 436 | 44.2 | 1739 | 49.6 | 2175 | 48.4 | <0.01 <sup>†</sup> |
| Moderate                   | 288 | 29.2 | 730  | 20.8 | 1018 | 22.6 |                    |
| Extreme                    | 263 | 26.6 | 1039 | 29.6 | 1302 | 29.0 |                    |

---

\* T-test, <sup>†</sup> Chi-square test
